# Supplementary material for: Gaze-Contingent Eye-Tracking Training in Brain Disorders: A Systematic Review
Source: MDPI journal article supplement (doi:10.3390/brainsci12070931), 2022-07-16
Supplement: s1 [file s1]

|                                                                                                                                                                                                                                                                                      |
|--------------------------------------------------------------------------------------------------------------------------------------------------------------------------------------------------------------------------------------------------------------------------------------|
| <b>PUBMED</b>                                                                                                                                                                                                                                                                        |
| ((Eye Tracking[Title/Abstract]) OR (Eye-Tracking[Title/Abstract]) OR<br>(Oculomotor[Title/Abstract])) AND ((Neuropsychol*[Title/Abstract]) OR<br>(Cognit*[Title/Abstract])) AND ((Training[Title/Abstract]) OR (Rehabilitation[Title/Abstract]) OR<br>(Stimulation[Title/abstract])) |
| <b>SCOPUS</b>                                                                                                                                                                                                                                                                        |
| TITLE-ABS ( ( "Eye Tracking" OR "Eye-<br>Tracking" OR "Oculomotor" ) AND ( "neuropsychol*" OR "cognitive" ) AND ( "rehabilitatio<br>n" OR "training" OR "stimulation" ) ) AND ( LIMIT-<br>TO ( PUBSTAGE , "final" ) ) AND ( LIMIT-TO ( LANGUAGE , "English" ) )                      |
| <b>Web Of Science</b>                                                                                                                                                                                                                                                                |
| AB=(((Eye AND Tracking) OR (Eye-Tracking) OR (Oculomotor)) AND ((Neuropsychol*) OR<br>(Cognitive)) AND (Training OR Rehabilitation OR Stimulation))                                                                                                                                  |
